# Supplementary material
Source: publisher site journal article supplement (https://www.spandidos-publications.com/7923/downloadSupplementary)
Supplement: Supplementary file 1 [file downloadSupplementary]

## Sheet: Sheet1
Table SII. Raw Ct values and amplification curves.
Block Type	96-Well 0.2-mL Block
Calibration Background is expired	No
Calibration Background performed on	03-11-2022
Calibration Pure Dye ABY is expired	No
Calibration Pure Dye ABY performed on	03-11-2022
Calibration Pure Dye CY5 is expired	No
Calibration Pure Dye CY5 performed on	03-11-2022
Calibration Pure Dye FAM is expired	No
Calibration Pure Dye FAM performed on	03-11-2022
Calibration Pure Dye JUN is expired	No
Calibration Pure Dye JUN performed on	03-11-2022
Calibration Pure Dye MUSTANG PURPLE is expired	No
Calibration Pure Dye MUSTANG PURPLE performed on	03-11-2022
Calibration Pure Dye NED is expired	No
Calibration Pure Dye NED performed on	03-11-2022
Calibration Pure Dye ROX is expired	No
Calibration Pure Dye ROX performed on	03-11-2022
Calibration Pure Dye SYBR is expired	No
Calibration Pure Dye SYBR performed on	03-11-2022
Calibration Pure Dye TAMRA is expired	No
Calibration Pure Dye TAMRA performed on	03-11-2022
Calibration Pure Dye VIC is expired	No
Calibration Pure Dye VIC performed on	03-11-2022
Calibration ROI is expired	No
Calibration ROI performed on	03-11-2022
Calibration Uniformity is expired	No
Calibration Uniformity performed on	03-11-2022
Chemistry	SYBR_GREEN
Date Created	2022-12-09 16:50:23 PM CST
Experiment Barcode
Experiment Comment
Experiment File Name	D:\data\ZZH\2022-12-09_133511.eds
Experiment Name	2022-12-09_133511
Experiment Run End Time	2022-12-09 15:20:58 PM CST
Experiment Type	Comparative Cт (ΔΔCт)
Instrument Name	2765219080264
Instrument Serial Number	2765219080264
Instrument Type	QuantStudio™ 5 System
Passive Reference	ROX
Post-read Stage/Step
Pre-read Stage/Step
Quantification Cycle Method	Ct
Signal Smoothing On	true
Stage where Melt Analysis is performed	Stage3
Stage/ Cycle where Ct Analysis is performed	Stage2, Step2
User Name
25	C1	FALSE	Sample 1	ARHGEF26-AS1	UNKNOWN	SYBR	None	1	0.437813	2.28408	17.647	17.5406	0.150482	-4.58754	0.391665	0.276949	0	TRUE	0.262553	TRUE	3	13	Amp	0.978196	N	N	79.1462
26	C2	FALSE	Sample 2	ARHGEF26-AS1	UNKNOWN	SYBR	None	0.508391	0.148668	1.73852	17.5943	17.6843	0.127286	-3.61155	0.583036	0.412268	0.975988	TRUE	0.262553	TRUE	3	13	Amp	0.97834	N	N	79.1462
27	C3	FALSE	Sample 3	ARHGEF26-AS1	UNKNOWN	SYBR	None	0.185254	0.000291261	117.829	17.9499	17.9683	0.0260191	-2.15511	3.06103	2.16447	2.43242	TRUE	0.262553	TRUE	3	13	Amp	0.975469	N	N	78.9989
28	C4	FALSE	Sample 1	AP005137.2	UNKNOWN	SYBR	None	1	0.142215	7.03161	28.7385	29.3404	0.85125	7.21224	0.924869	0.653981	0	TRUE	0.293252	TRUE	3	23	Amp	0.966433	Y	Y	83.1222	77.8208
29	C5	FALSE	Sample 2	AP005137.2	UNKNOWN	SYBR	None	0.249871	0.0308748	2.02222	31.0831	30.5089	0.812044	9.21299	0.991536	0.701122	2.00074	TRUE	0.293252	TRUE	3	24	Amp	0.961414	N	Y	83.1222
30	C6	FALSE	Sample 3	AP005137.2	UNKNOWN	SYBR	None	0.330823	0.000511371	214.021	29.0897	28.9315	0.223706	8.80811	3.06908	2.17017	1.59587	TRUE	0.293252	TRUE	3	24	Amp	0.959211	N	N	83.2694
31	C7	FALSE	Sample 1	AP000695.1	UNKNOWN	SYBR	None	1	0.343294	2.91295	28.495	28.2437	0.355362	6.11556	0.50699	0.358496	0	TRUE	0.311903	TRUE	3	22	Amp	0.973996	N	N	79.588
32	C8	FALSE	Sample 2	AP000695.1	UNKNOWN	SYBR	None	0.718509	0.212645	2.42777	27.9577	27.8883	0.098014	6.59248	0.577352	0.40825	0.476922	TRUE	0.311903	TRUE	3	22	Amp	0.971852	N	N	79.588
33	C9	FALSE	Sample 3	AP000695.1	UNKNOWN	SYBR	None	0.303057	0.000476521	192.738	27.9472	27.9613	0.0198906	7.83789	3.06098	2.16444	1.72234	TRUE	0.311903	TRUE	3	22	Amp	0.971402	N	N	79.4407
34	C10	FALSE	Sample 1	AC026355.2	UNKNOWN	SYBR	None	1	0.389434	2.56783	30.7658	30.5798	0.263104	8.45164	0.447191	0.316212	0	TRUE	0.25677	TRUE	3	25	Amp	0.973102	N	N	81.0605
35	C11	FALSE	Sample 2	AC026355.2	UNKNOWN	SYBR	None	1.26628	0.115972	13.8264	30.1002	29.4069	0.98041	8.11104	1.13355	0.80154	-0.340602	TRUE	0.25677	TRUE	3	24	Amp	0.975556	Y	Y	84.153	78.5571
36	C12	FALSE	Sample 3	AC026355.2	UNKNOWN	SYBR	None	0.180486	0.000276844	117.666	30.8547	31.0451	0.269239	10.9217	3.07273	2.17275	2.47004	TRUE	0.25677	TRUE	3	25	Amp	0.962042	Y	N	85.3311	80.4715
37	D1	FALSE	Sample 1	ARHGEF26-AS1	UNKNOWN	SYBR	None	1	0.437813	2.28408	17.4342	17.5406	0.150482	-4.58754	0.391665	0.276949	0	TRUE	0.262553	TRUE	3	11	Amp	0.962068	N	N	78.9989
38	D2	FALSE	Sample 2	ARHGEF26-AS1	UNKNOWN	SYBR	None	0.508391	0.148668	1.73852	17.7743	17.6843	0.127286	-3.61155	0.583036	0.412268	0.975988	TRUE	0.262553	TRUE	3	11	Amp	0.970966	N	N	78.7044
39	D3	FALSE	Sample 3	ARHGEF26-AS1	UNKNOWN	SYBR	None	0.185254	0.000291261	117.829	17.9867	17.9683	0.0260191	-2.15511	3.06103	2.16447	2.43242	TRUE	0.262553	TRUE	3	13	Amp	0.98676	N	N	78.9989
40	D4	FALSE	Sample 1	AP005137.2	UNKNOWN	SYBR	None	1	0.142215	7.03161	29.9423	29.3404	0.85125	7.21224	0.924869	0.653981	0	TRUE	0.293252	TRUE	3	23	Amp	0.967069	N	Y	82.9749
41	D5	FALSE	Sample 2	AP005137.2	UNKNOWN	SYBR	None	0.249871	0.0308748	2.02222	29.9347	30.5089	0.812044	9.21299	0.991536	0.701122	2.00074	TRUE	0.293252	TRUE	3	23	Amp	0.968411	N	Y	83.1222
42	D6	FALSE	Sample 3	AP005137.2	UNKNOWN	SYBR	None	0.330823	0.000511371	214.021	28.7733	28.9315	0.223706	8.80811	3.06908	2.17017	1.59587	TRUE	0.293252	TRUE	3	22	Amp	0.970347	N	N	83.1222
43	D7	FALSE	Sample 1	AP000695.1	UNKNOWN	SYBR	None	1	0.343294	2.91295	27.9924	28.2437	0.355362	6.11556	0.50699	0.358496	0	TRUE	0.311903	TRUE	3	22	Amp	0.97087	N	N	79.4407
44	D8	FALSE	Sample 2	AP000695.1	UNKNOWN	SYBR	None	0.718509	0.212645	2.42777	27.819	27.8883	0.098014	6.59248	0.577352	0.40825	0.476922	TRUE	0.311903	TRUE	3	22	Amp	0.970868	N	N	79.588
45	D9	FALSE	Sample 3	AP000695.1	UNKNOWN	SYBR	None	0.303057	0.000476521	192.738	27.9753	27.9613	0.0198906	7.83789	3.06098	2.16444	1.72234	TRUE	0.311903	TRUE	3	22	Amp	0.976087	N	N	79.2934
46	D10	FALSE	Sample 1	AP000695.1	UNKNOWN	SYBR	None	1	0.389434	2.56783	30.3938	30.5798	0.263104	8.45164	0.447191	0.316212	0	TRUE	0.25677	TRUE	3	25	Amp	0.966712	Y	N	79.588	84.3002
47	D11	FALSE	Sample 2	AP000695.1	UNKNOWN	SYBR	None	1.26628	0.115972	13.8264	28.7137	29.4069	0.98041	8.11104	1.13355	0.80154	-0.340602	TRUE	0.25677	TRUE	3	22	Amp	0.98527	N	Y	78.4099
48	D12	FALSE	Sample 3	AP000695.1	UNKNOWN	SYBR	None	0.180486	0.000276844	117.666	31.2355	31.0451	0.269239	10.9217	3.07273	2.17275	2.47004	TRUE	0.25677	TRUE	3	25	Amp	0.953037	Y	N	79.2934	86.5091
88	H4	FALSE	Sample 1	actin	UNKNOWN	SYBR	None	1	0.464902	2.15099	14.1959	14.1719	0.0339946	-7.95627	0.363197	0.256819	0	TRUE	0.245186	TRUE	3	9	Amp	0.957478	N	N	86.3619
89	H5	FALSE	Sample 2	actin	UNKNOWN	SYBR	None	0.272033	0.0784034	0.94386	15.3279	15.2177	0.15581	-6.07812	0.58992	0.417136	1.87815	TRUE	0.245186	TRUE	3	11	Amp	0.952394	N	N	86.3619
90	H6	FALSE	Sample 3	actin	UNKNOWN	SYBR	None	0.160822	0.000252651	102.369	14.842	14.8036	0.0542959	-5.31981	3.0614	2.16473	2.63646	TRUE	0.245186	TRUE	3	10	Amp	0.947186	N	N	86.3619
